# Supplementary material
Source: PubMed Central journal article supplement (PMC3701239)

Raw Western blots data from Figure 2.

COMPLEX I:

NADHs9 (~52KDa):

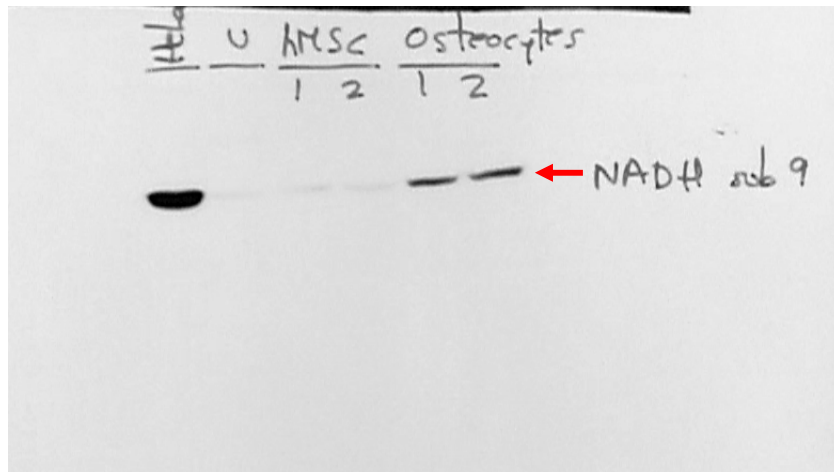

NDUFS3 (~30KDa):

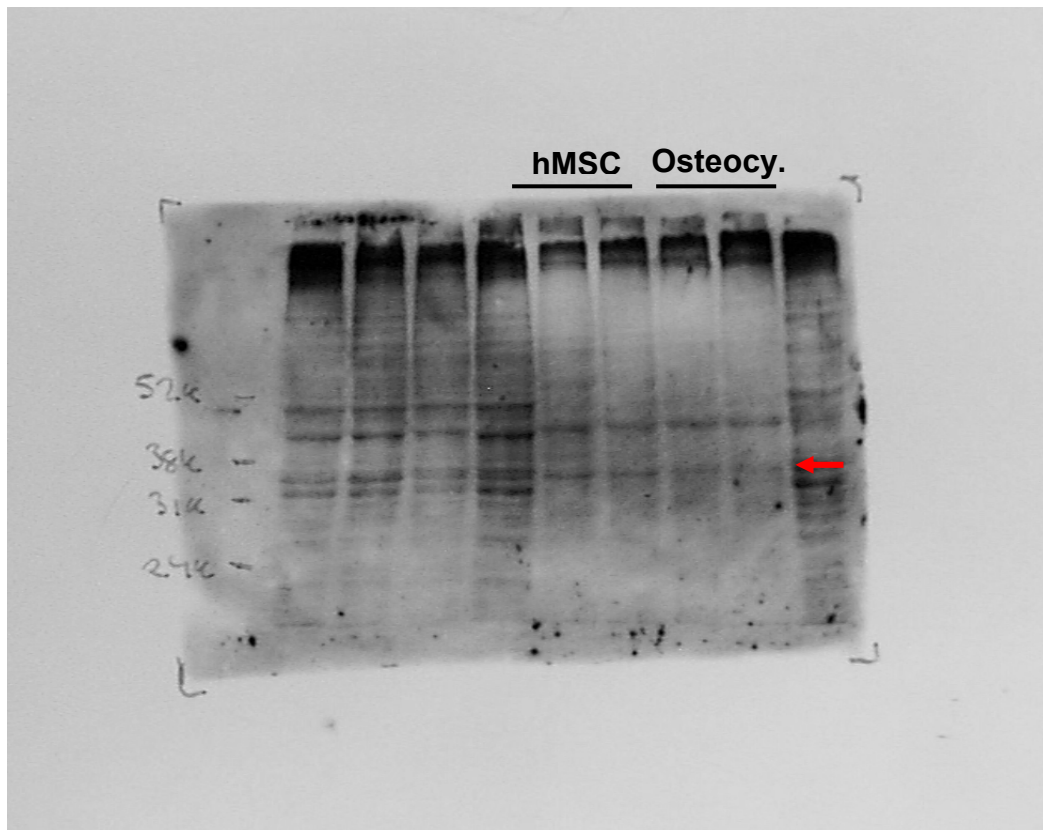

**COMPLEX II:**

**SDH-B (~30KDa):**

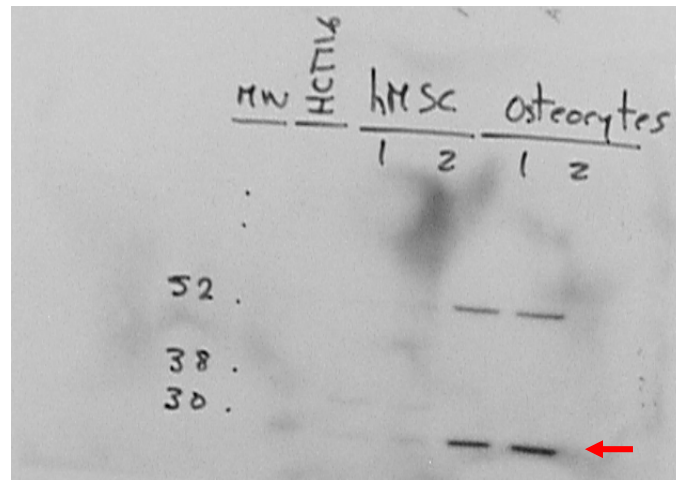

**COMPLEX III:**

**Core 2: (~52KDa)**

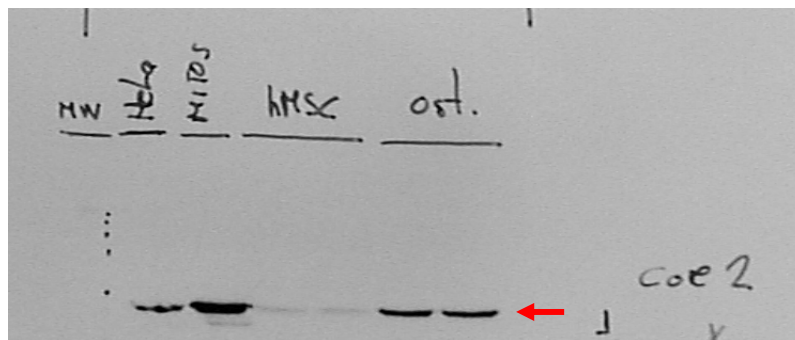

**COMPLEX IV:**

**COXI: (~39KDa)**

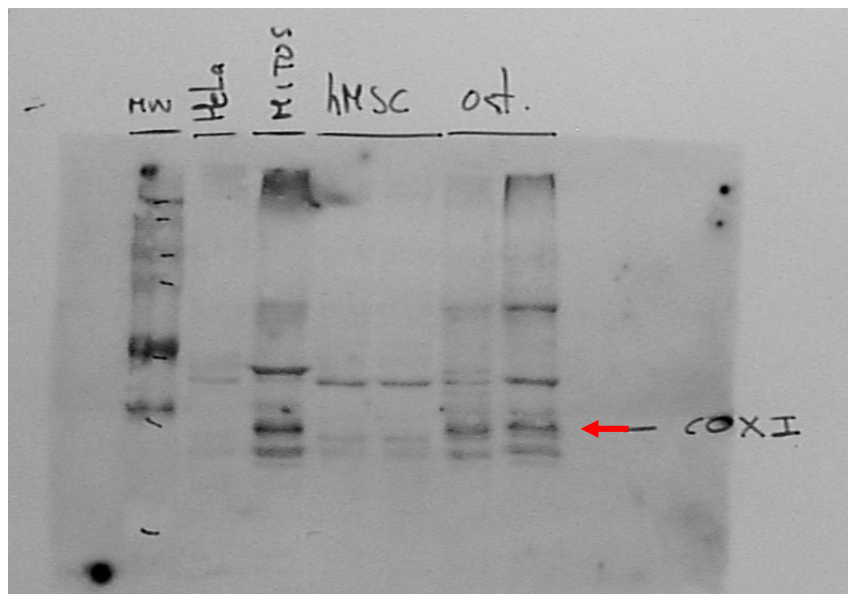

**COXII: (~24KDa)**

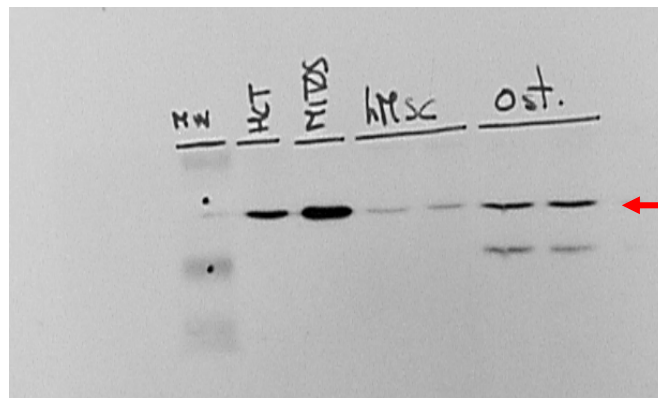

**COXIV(~17KDa):**

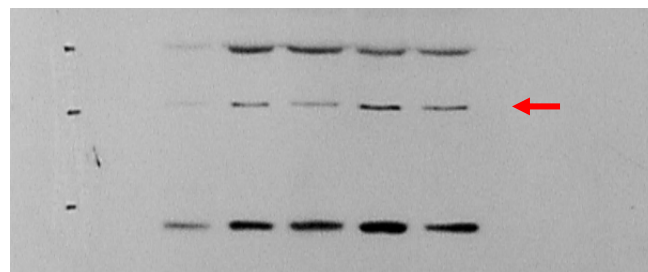

**COMPLEX V:**

**$\beta$ -F1-ATPase (~56Kda):**

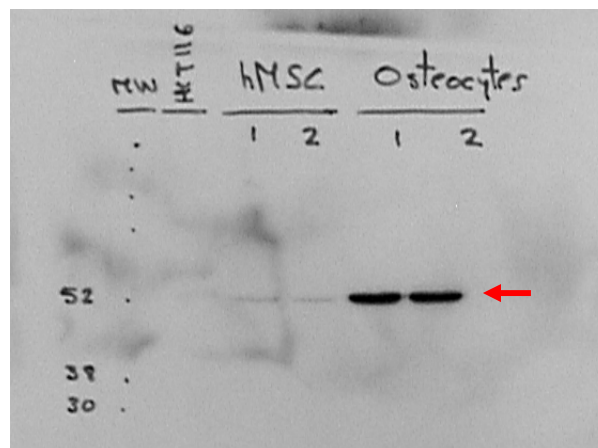

**$\alpha$ -F1-ATPase (~56KDa):**

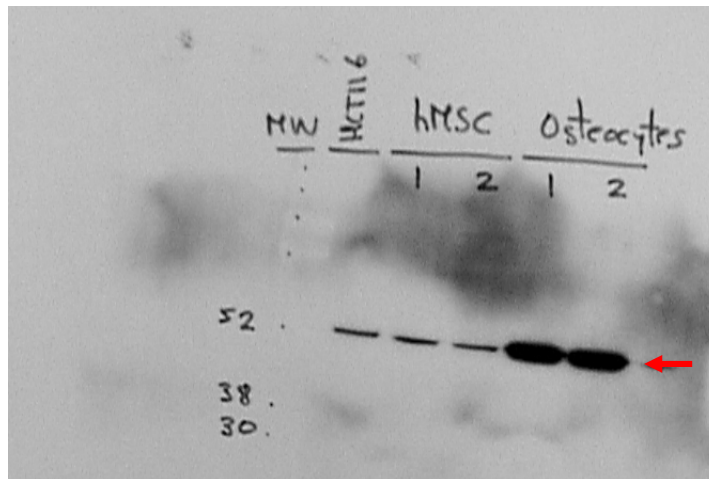

**OTHER MITOCHONDRIAL PROTEINS:**

**HADHA (~83KDa):**

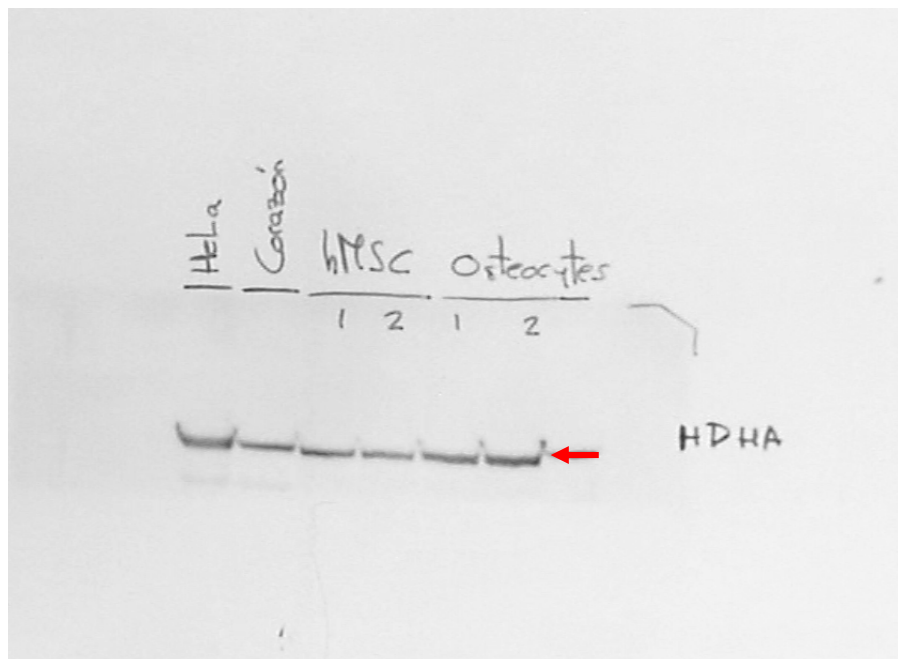

Hsp60 (~60KDa):

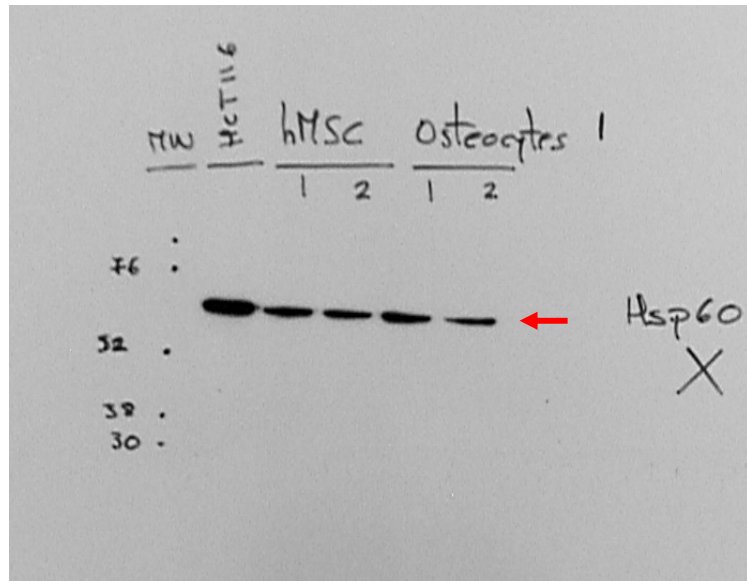

VDAC (~31KDa):

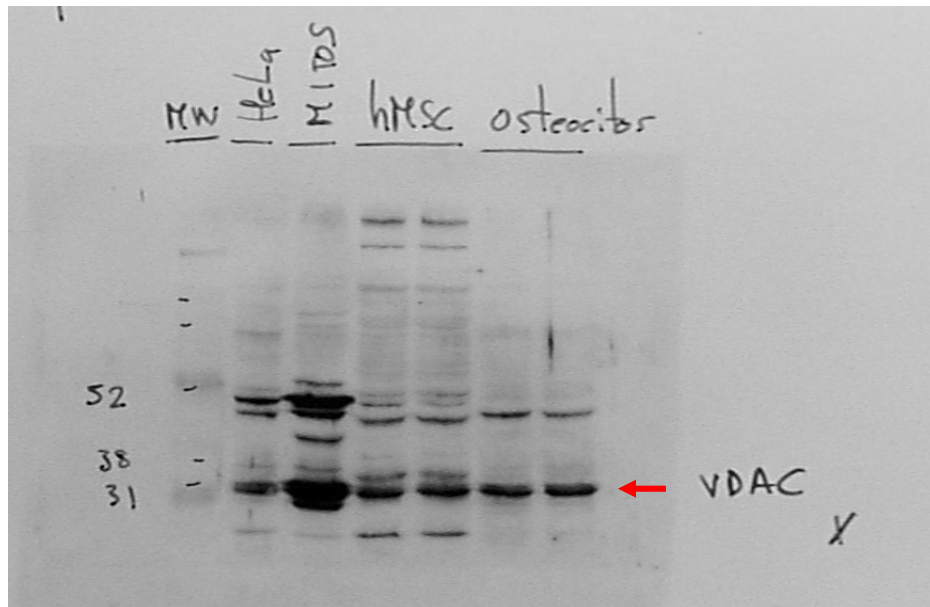

**GLYCOLYTIC ENZYMES:**

**GAPDH (~35KDa):**

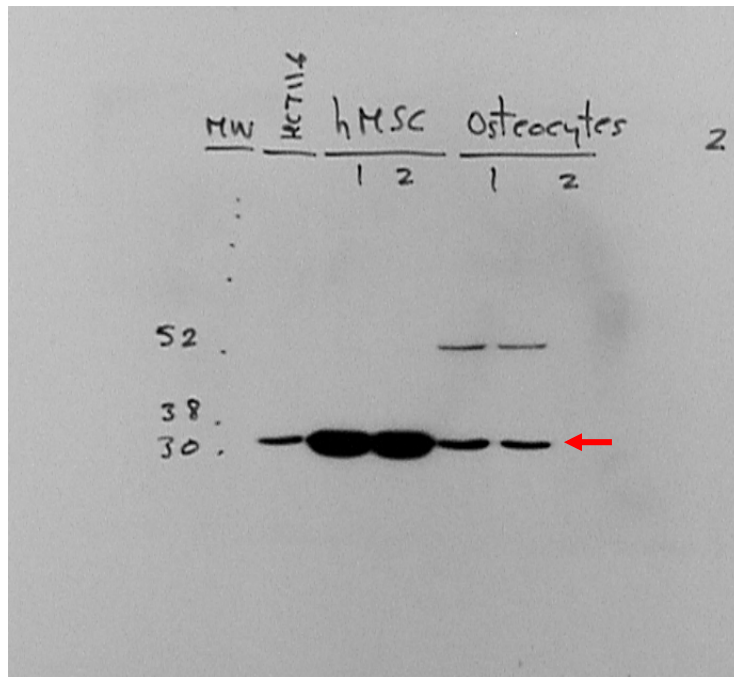

**PK-M2(~60KDa) :**

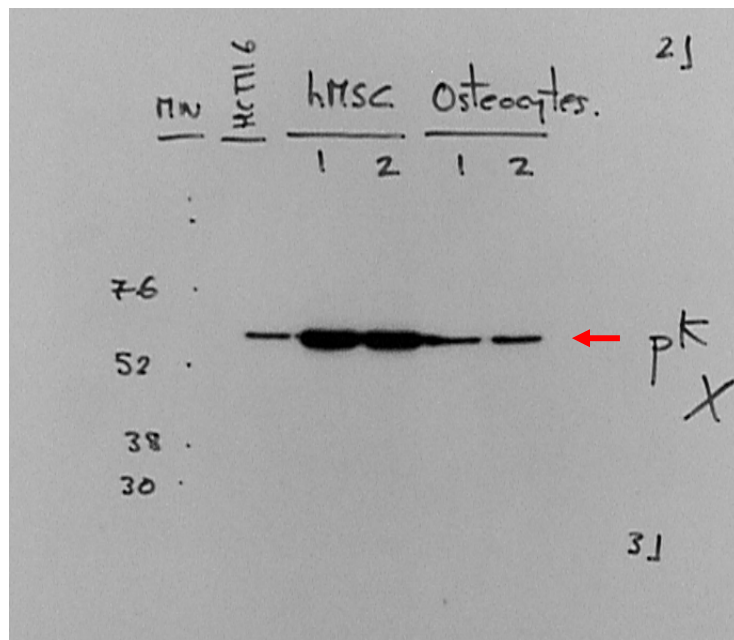

**LDHA (~35KDa):**

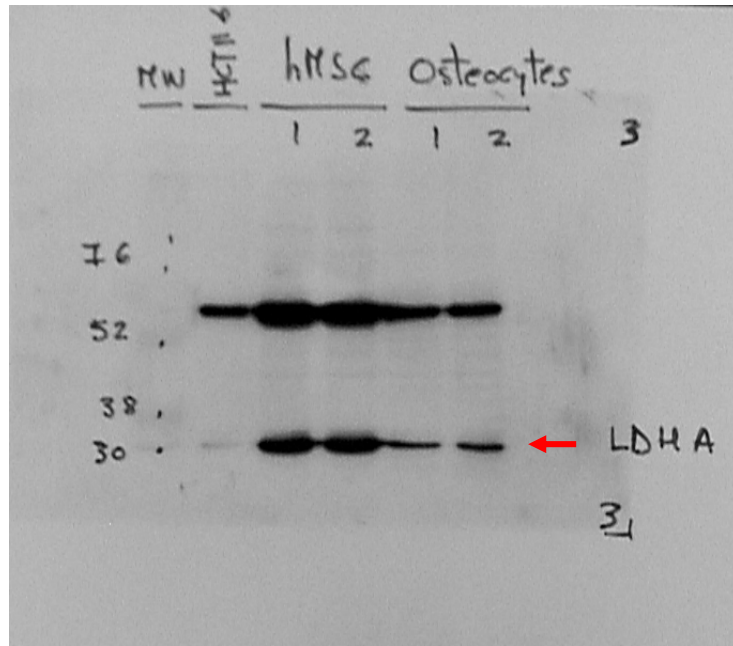

**TUBULIN (~60KDa):**

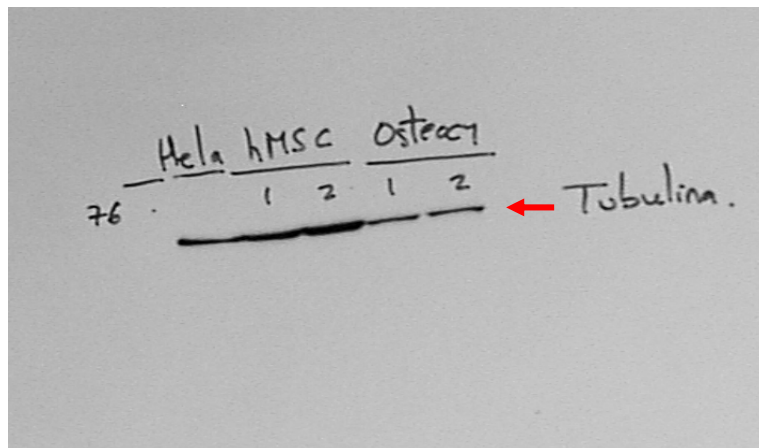

Raw Fluorescence Images (40X and 63X).

hMSCs

Osteocytes

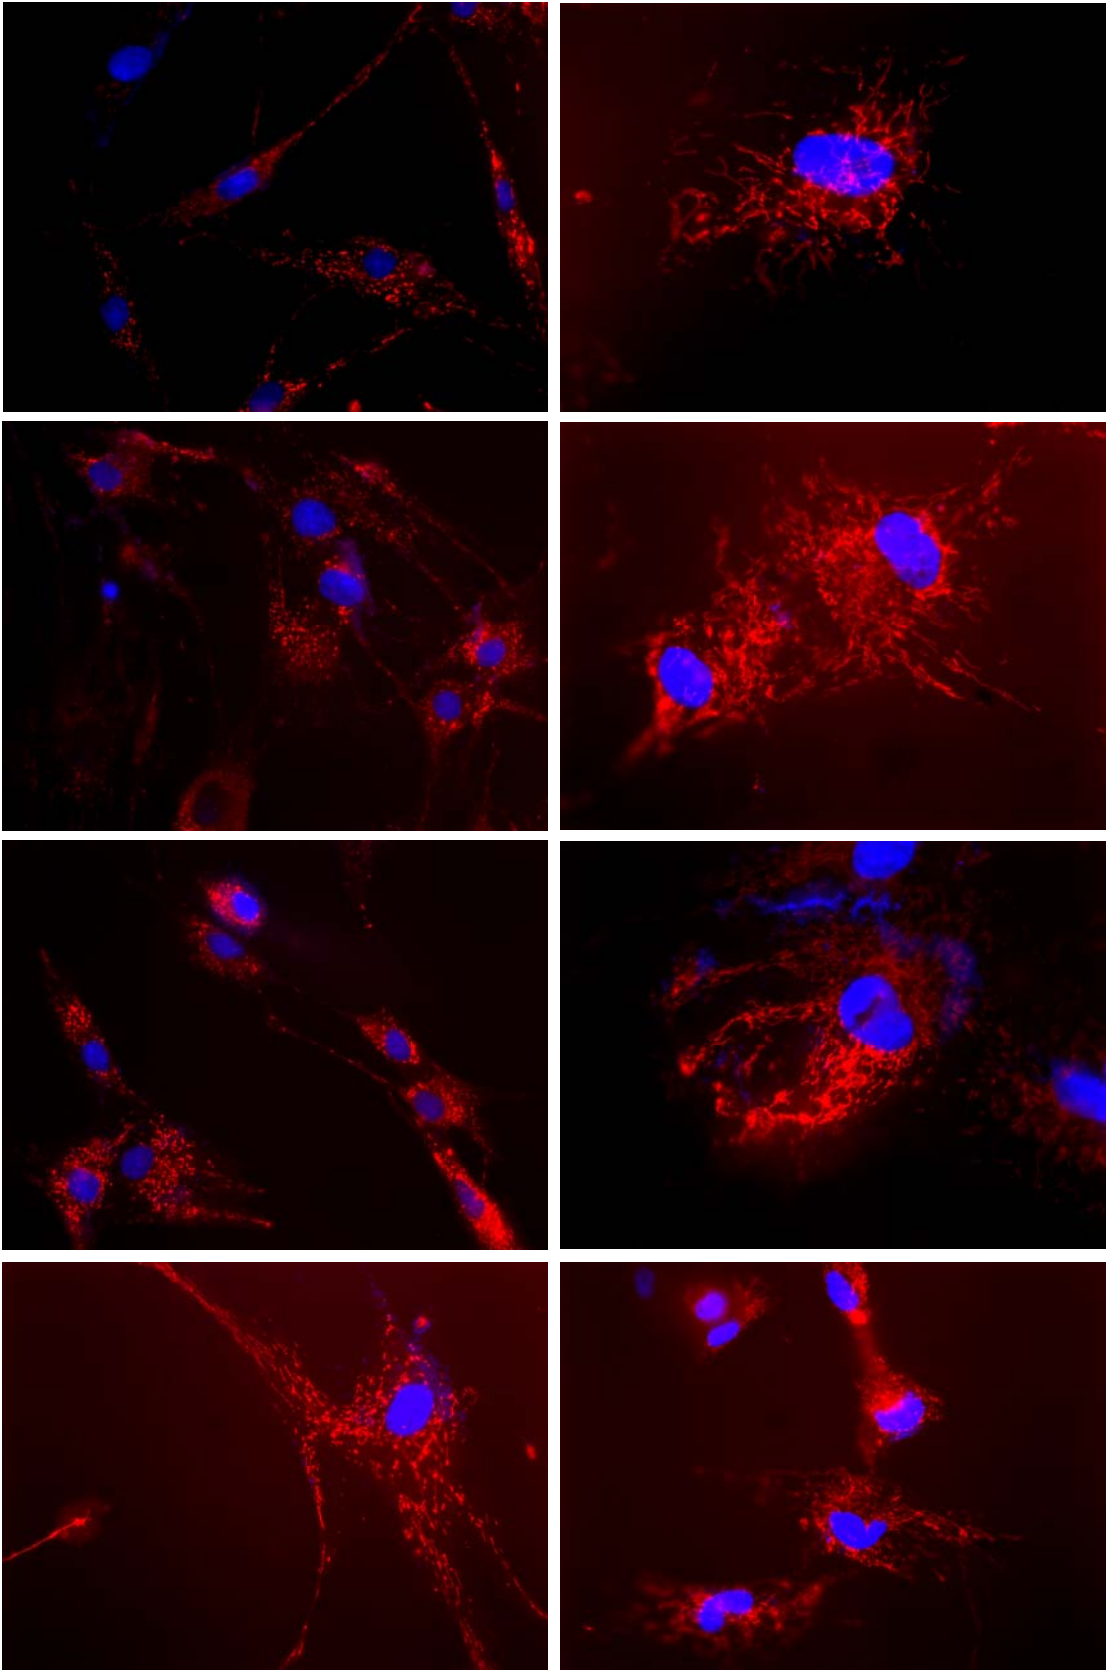



# Raw Electron Microscopy Images (20X)

## hMSCs

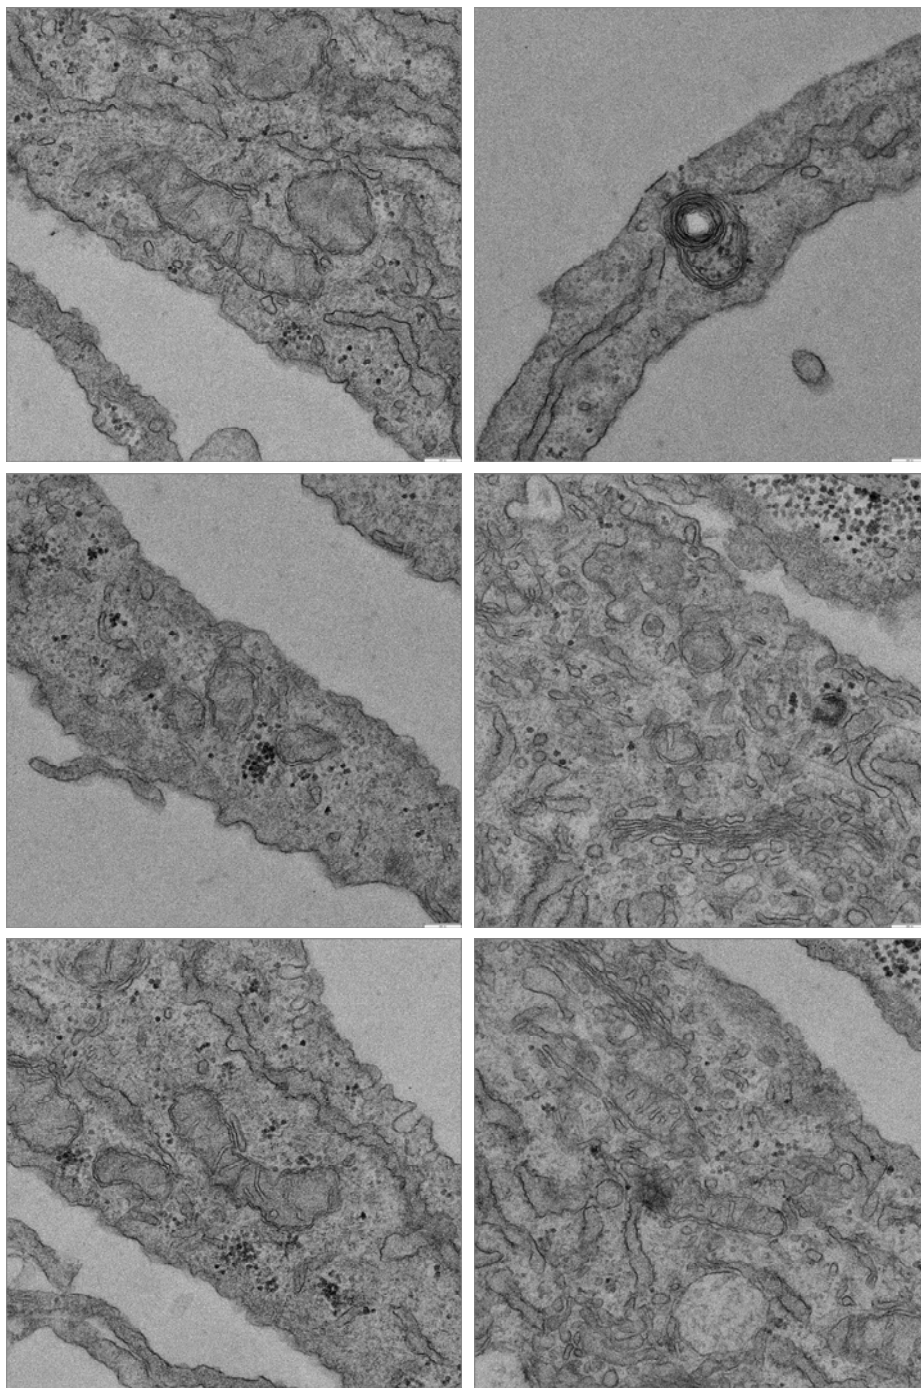

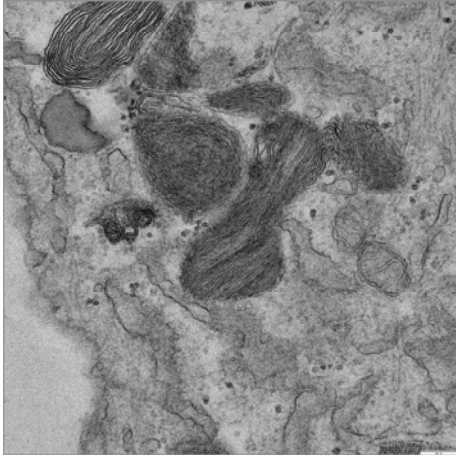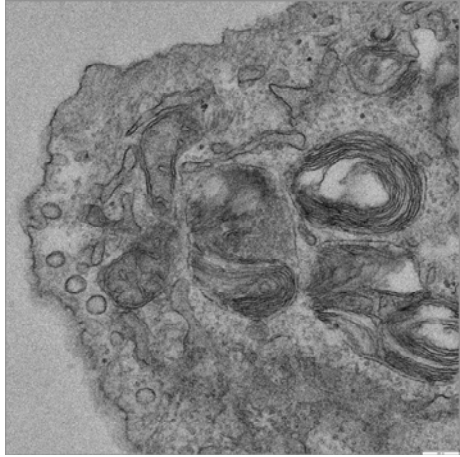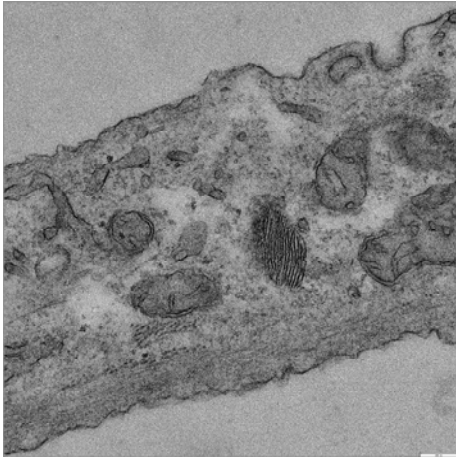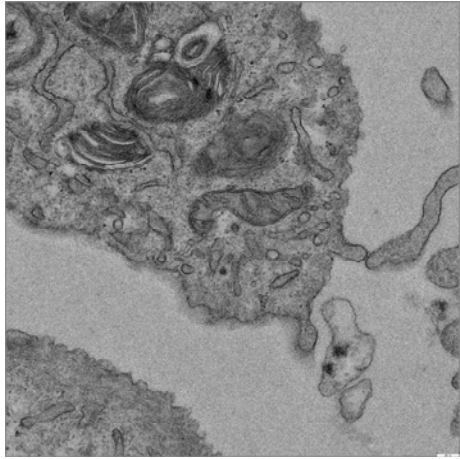

# Osteocytes

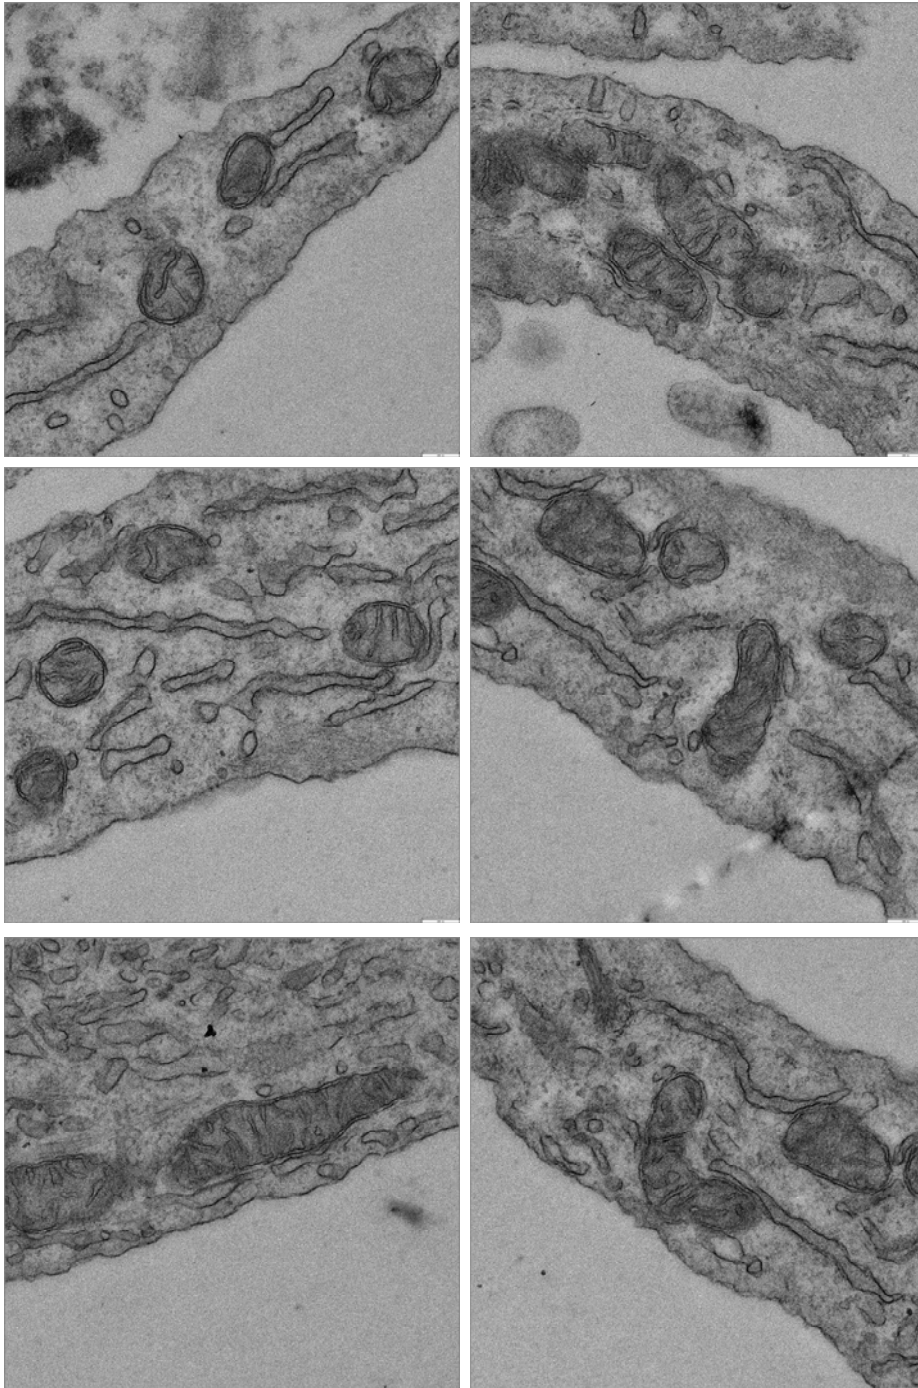

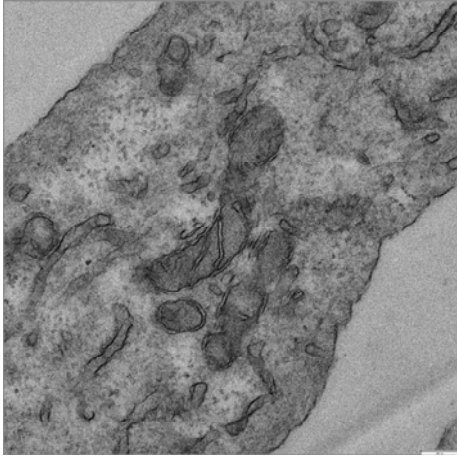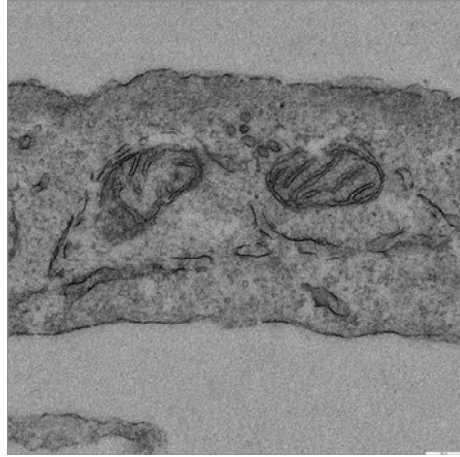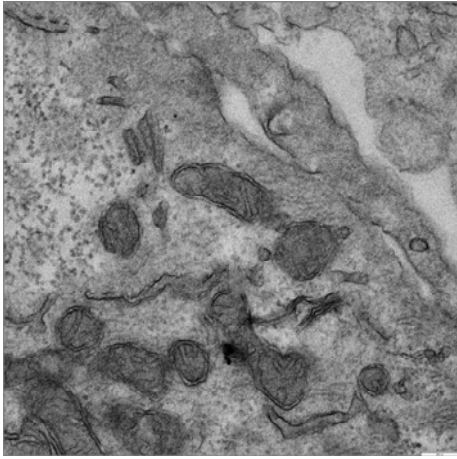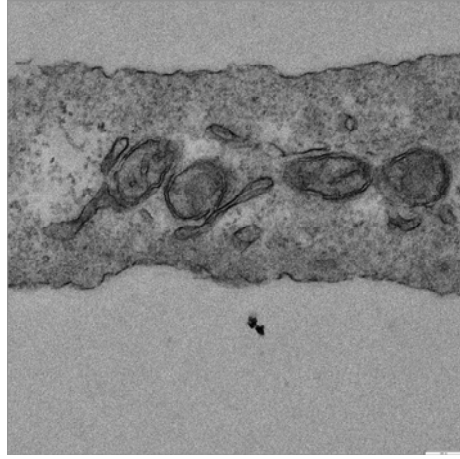

Supplement: embor201372df2.pdf [file embor201372df2.pdf]
