# Supplementary material
Source: PubMed Central journal article supplement (PMC3701239)

Raw Western Blots data from Figure 3.

Expression of IF1 (Fig. 3A):

IF1:

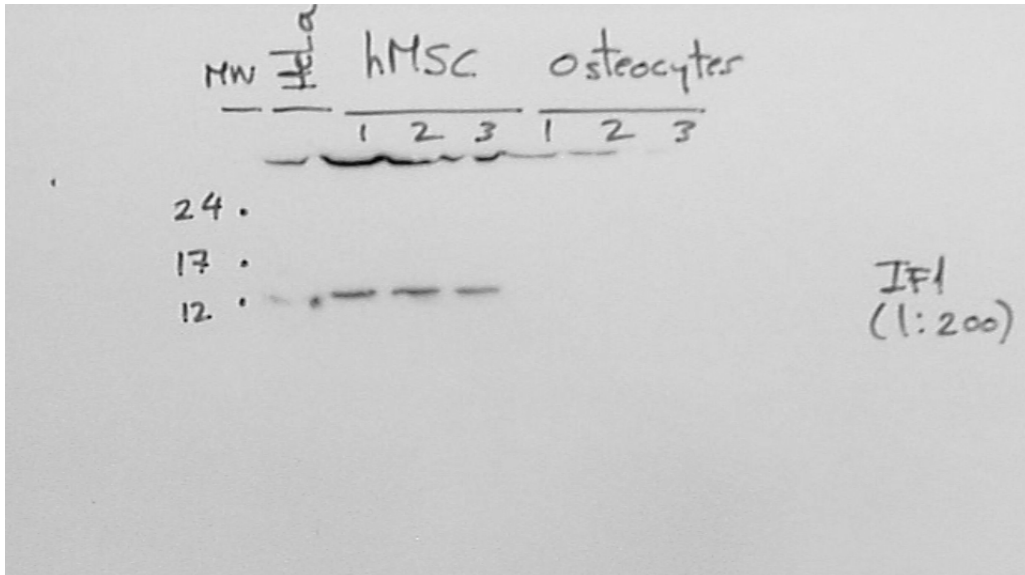

Tubulin:

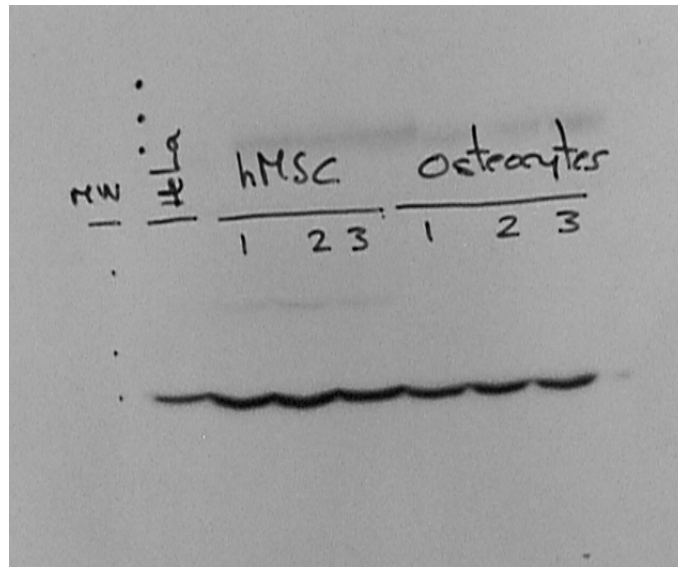

Treatment with AEBSF (Fig. 3F):

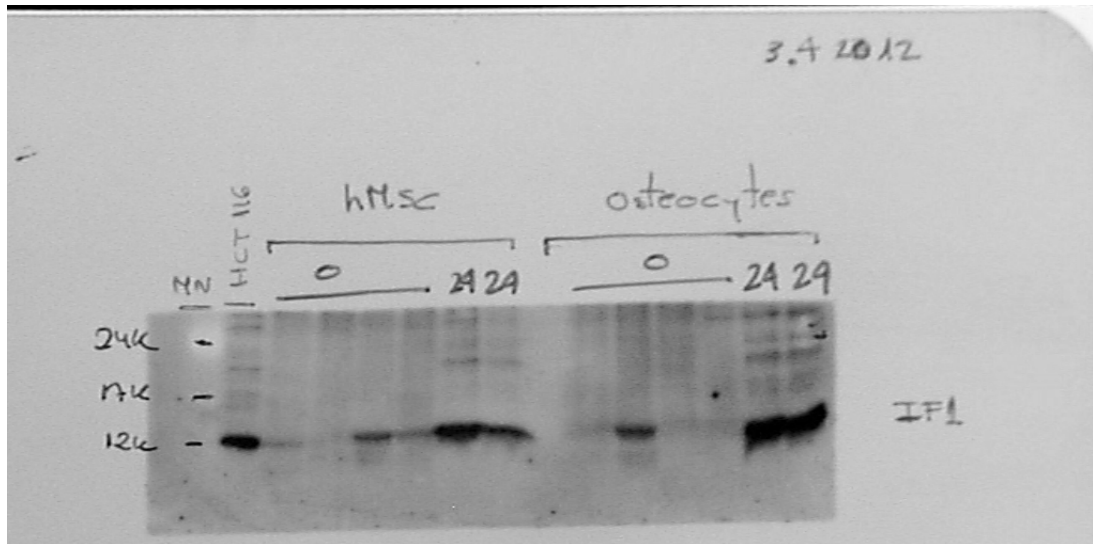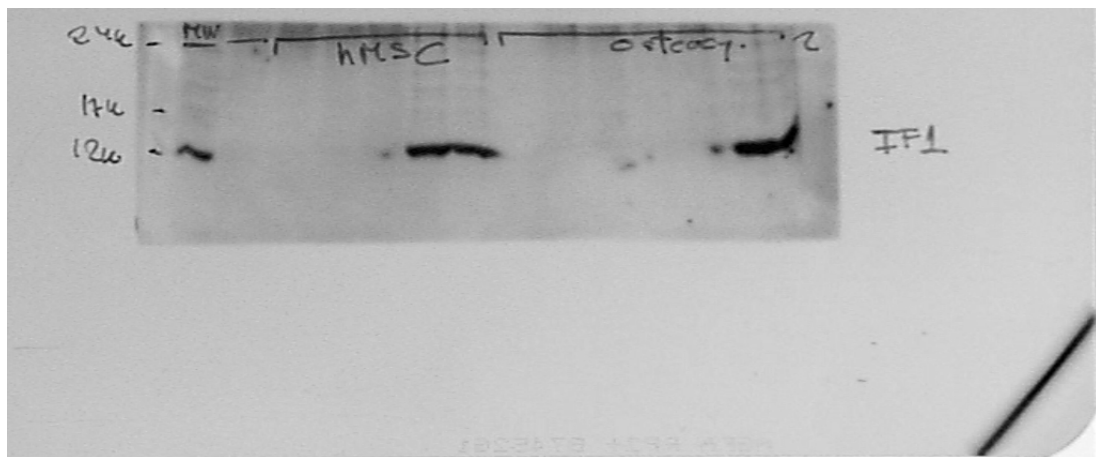

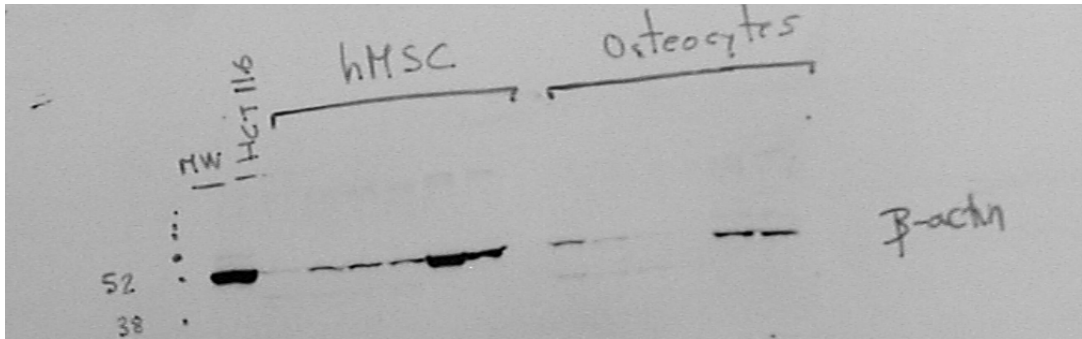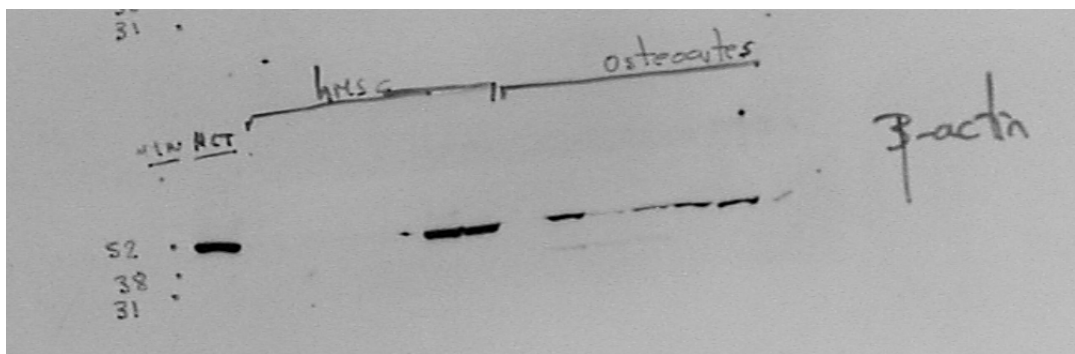

siIF1-accelerated differentiation (Fig. 3H).

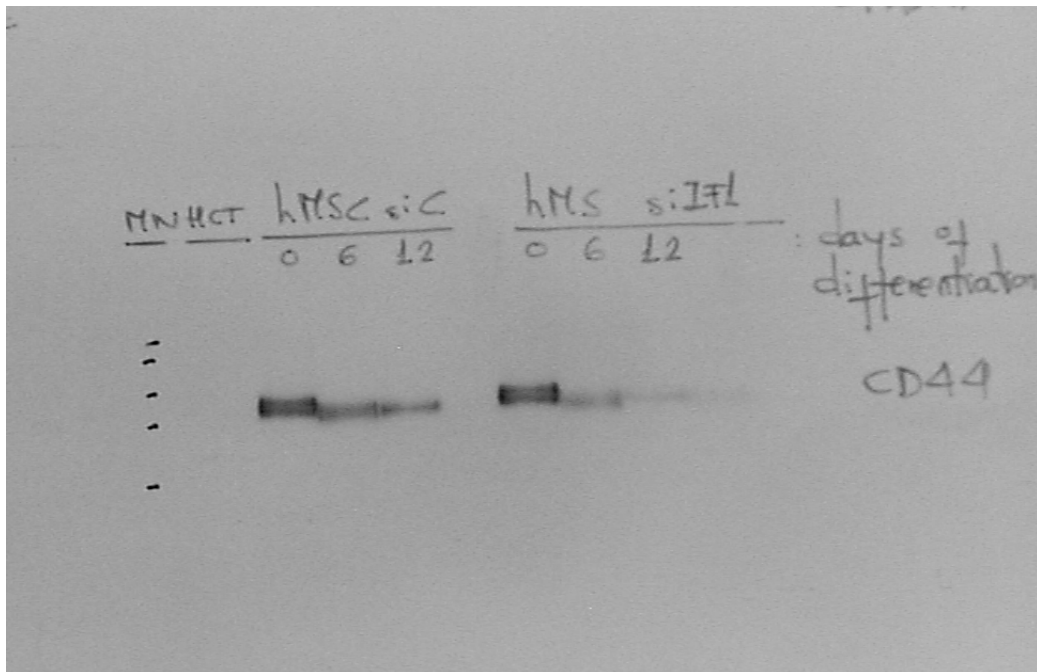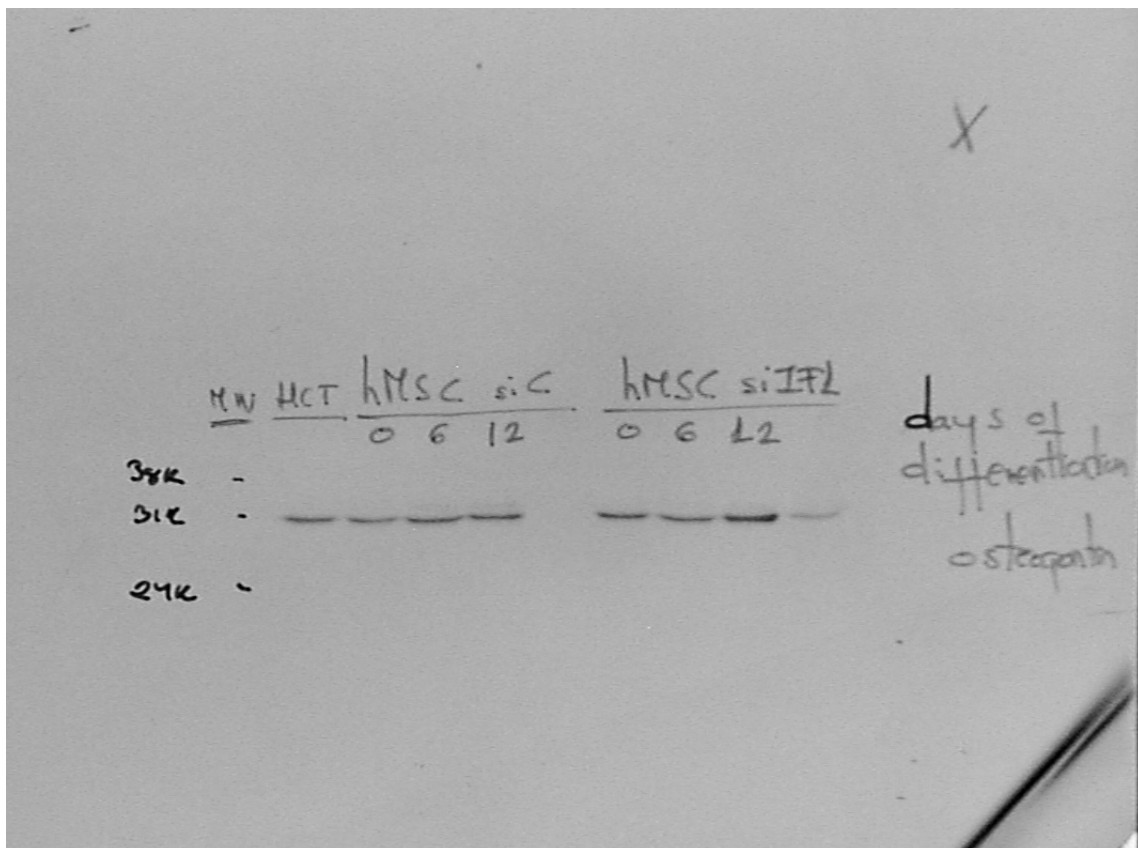

Supplement: embor201372df3.pdf [file embor201372df3.pdf]
