# Supplementary material
Source: PubMed Central journal article supplement (PMC3701239)

Raw Western blots data from Figure 1.

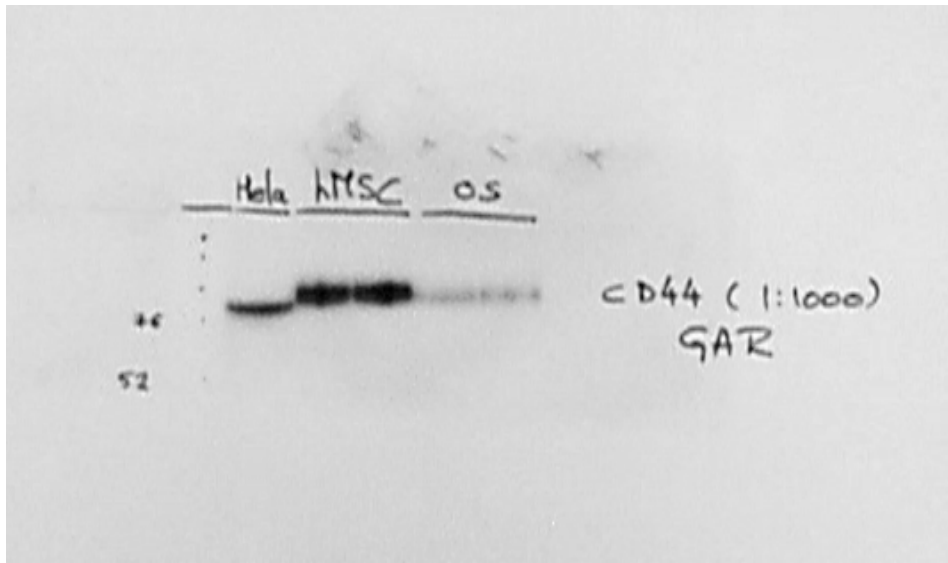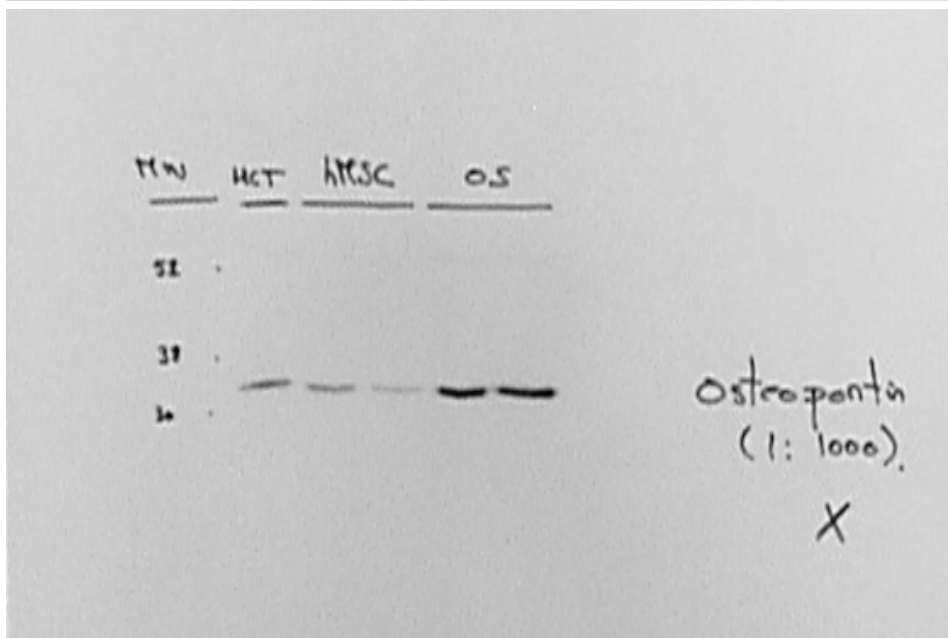

Supplement: embor201372df1.pdf [file embor201372df1.pdf]
